# Supplementary material for: Involvement of striatal motoric subregions in familial frontotemporal dementia with parkinsonism harboring the C9orf72 repeat expansions
Source: PubMed Central journal article supplement (PMC9537191; doi:10.1038/s41531-022-00398-5), 2022-10-06
Supplement: 41531_2022_398_MOESM1_ESM.pdf [file 41531_2022_398_MOESM1_ESM.pdf]

Supplementary Table 1. Clinical, neuropsychological, and neuroimaging findings of these two FTDP patients

|                            | Patient 1<br>(III-4) | Patient 2<br>(III-6) |
|----------------------------|----------------------|----------------------|
| Age at evaluation (y)      | 68                   | 65                   |
| Gender                     | Female               | Male                 |
| Education                  | 19                   | 12                   |
| Age at onset               | 65                   | 62                   |
| Family history             | +                    | +                    |
| Parkinsonism               | +                    | +                    |
| Bradykinesia               | +                    | +                    |
| Rigidity                   | +                    | +                    |
| Tremor                     | -                    | -                    |
| Postural instability       | -                    | -                    |
| Response to levodopa       | +, Partial           | -                    |
| FTD                        |                      |                      |
| Dementia                   | +                    | +                    |
| Personality changes        | +                    | +                    |
| Speech changes             | +                    | +                    |
| Physical examination       |                      |                      |
| Eye movements              | -                    | -                    |
| Babinski reflex            | -                    | -                    |
| Muscle atrophy             | -                    | -                    |
| Fasciculations             | -                    | -                    |
| Neuropsychology assessment |                      |                      |
| MMSE                       | 13                   | NA                   |
| MoCA                       | 5                    | NA                   |
| AVLT: immediate recall     | 3                    | NA                   |
| AVLT: delayed recall       | 0                    | NA                   |
| Trial making test A (s)    | NA                   | NA                   |
| Trial making test B (s)    | NA                   | NA                   |
| BNT                        | 12                   | NA                   |
| CDR                        | 2                    | 2                    |
| NPI-Q                      | 16                   | 9                    |
| FBI                        | 25                   | 23                   |
| MBI-C                      | 18                   | 19                   |
| Neuroimaging examination   |                      |                      |
| Brain atrophy on MRI       | +                    | +                    |
| [18F]-FDG PET/MRI          | +                    | +                    |
| [18F]-DTBZ PET/CT          | NA                   | +                    |

Supplementary Table 2. Regions with grey atrophy and reduced glucose metabolism in FTDP patients compared to controls significant at the cluster level by FDR corrected for multiple comparisons over the functional distribution of the striatum.

| Patient   | Region                   | Side | Cluster Size | T value        |        |
|-----------|--------------------------|------|--------------|----------------|--------|
|           |                          |      |              | Peak intensity | Mean   |
| III-4     | <b>GM atrophy</b>        |      |              |                |        |
|           | Limbic                   | R    | 16           | -12.39         | -5.18  |
|           | Limbic                   | L    | 15           | -9.25          | -5.60  |
|           | Executive                | R    | 253          | -15.00         | -5.97  |
|           | Executive                | L    | 258          | -14.12         | -6.18  |
|           | Rostral-motor            | R    | 9            | -6.02          | -4.02  |
|           | Rostral-motor            | L    | 19           | -7.08          | -3.92  |
|           | Caudal-motor             | R    | 27           | -11.47         | -5.33  |
|           | Caudal-motor             | L    | 14           | -8.02          | -4.03  |
|           | Parietal                 | R    | 12           | -9.65          | -4.89  |
|           | Parietal                 | L    | 1            | -8.45          | -8.45  |
|           | Temporal                 | R    | 1            | -11.61         | -11.61 |
|           | <b>GM hypometabolism</b> |      |              |                |        |
|           | Limbic                   | R    | 44           | -11.09         | -5.16  |
|           | Limbic                   | L    | 52           | -9.72          | -5.03  |
|           | Executive                | R    | 160          | -11.03         | -5.54  |
|           | Executive                | L    | 203          | -11.79         | -5.65  |
|           | Rostral-motor            | L    | 6            | -4.71          | -3.93  |
|           | Caudal-motor             | R    | 1            | -3.42          | -3.42  |
|           | Caudal-motor             | L    | 2            | -3.46          | -3.30  |
| Temporal  | L                        | 1    | -3.11        | -3.11          |        |
| III-6     | <b>GM atrophy</b>        |      |              |                |        |
|           | Limbic                   | R    | 51           | -14.11         | -5.42  |
|           | Limbic                   | L    | 55           | -14.41         | -4.88  |
|           | Executive                | R    | 296          | -16.37         | -6.80  |
|           | Executive                | L    | 351          | -16.11         | -6.59  |
|           | Rostral-motor            | R    | 5            | -6.65          | -4.07  |
|           | Rostral-motor            | L    | 13           | -5.59          | -3.90  |
|           | Caudal-motor             | R    | 27           | -12.81         | -5.64  |
|           | Caudal-motor             | L    | 13           | -8.43          | -4.10  |
|           | Parietal                 | R    | 15           | -10.70         | -4.88  |
|           | Parietal                 | L    | 5            | -9.54          | -4.46  |
|           | Temporal                 | R    | 1            | -12.09         | -12.09 |
|           | Temporal                 | L    | 1            | -6.53          | -6.53  |
|           | <b>GM hypometabolism</b> |      |              |                |        |
|           | Limbic                   | R    | 30           | -11.68         | -5.52  |
|           | Limbic                   | L    | 25           | -10.71         | -5.44  |
| Executive | R                        | 129  | -11.14       | -5.60          |        |
| Executive | L                        | 176  | -10.89       | -5.64          |        |

Supplementary Table 3. The selective gene associated with FTD, parkinsonism and other neurodegenerative diseases for analyses

| Classification                          | Gene list                                                                                                                                                                                                                                                |
|-----------------------------------------|----------------------------------------------------------------------------------------------------------------------------------------------------------------------------------------------------------------------------------------------------------|
| Frontotemporal Dementia-associated gene | MAPT, GRN, TARDBP, FUS, VCP, CHMP2B, SQSTM1, CHCHD10, TBK1, UBQLN2, OPTN, CCNF, TIA1                                                                                                                                                                     |
| Parkinsonism -associated gene           | ACMSD, ADH1C, ATP1A3, ATP6AP2, ATXN8OS, CHCHD2, DNAJC13, DNAJC6, FBXO7, GIGYF2, GLUD2, HTRA2, LRP10, LRRK2, PACRG, PARK7, PINK1, PLA2G6, PRKN, RAB29, SLC18A2, SLC6A3, SNCA, SNCAIP, SYNJ1, TAF1, TBP, UCHL1, UQCRC1, VPS13C, VPS35, VPS35L, GBA, EIF4G1 |
| Other neurodegeneration-associated gene | PSEN1, PSEN2, APP, TREM2, DCTN1, SIGMAR1, hnRNPA2B1, NOTCH3, TRPM7, ABCC1, APBB2, ATP13A2, SPG21, DMT1, VPS2B, ALS17, SCN8A, COQ2, TSC1, TSC2, HCFC1, ITPR3                                                                                              |
